# Supplementary material
Source: Springer Nature journal article supplement (https://www.springermedizin.de/resource/supplementary/13058_2011_2918_MOESM9_ESM.pdf/9702756)

A

UACC-812

BT474

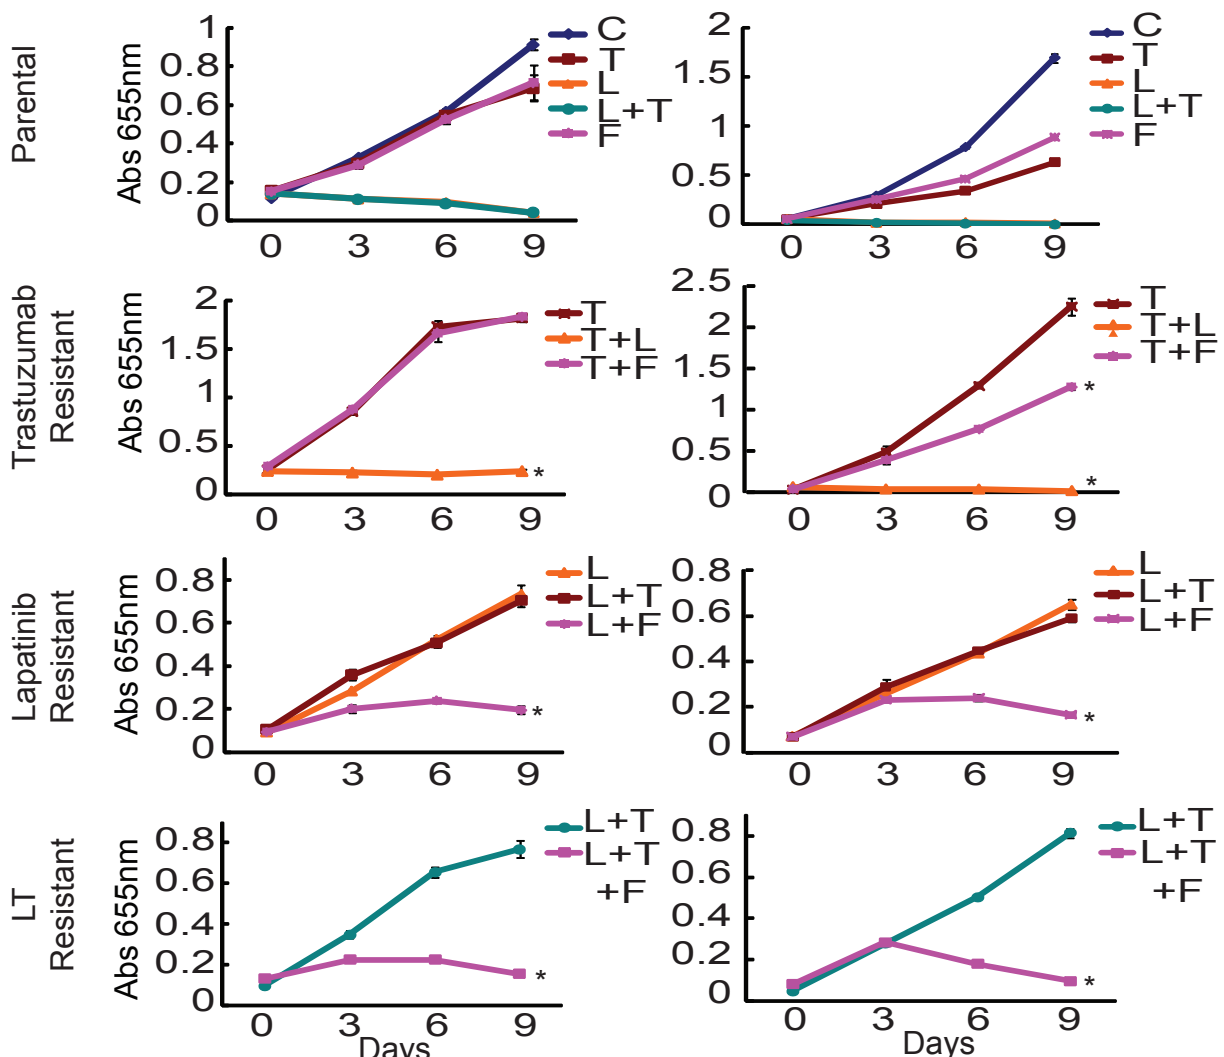

B

UACC-812

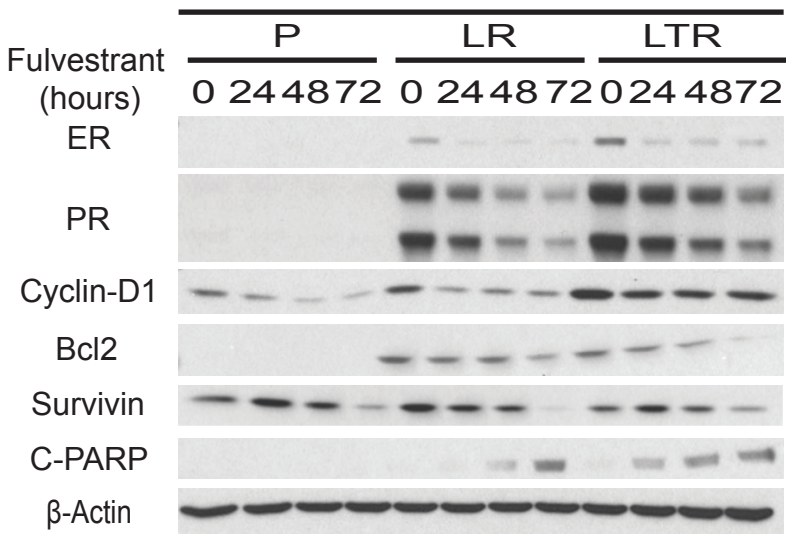

Supplement: MOESM9 [file 9702756]
